# Supplementary material for: Stabilizing benzene-like planar N6rings to form a single atomic honeycomb BeN3sheet with high carrier mobility
Source: Royal Society of Chemistry journal article supplement (doi:10.1039/c7nr07845e), 2017-11-21
Supplement: c7nr07845e1.pdf [file c7nr07845e1.pdf]

Electronic supplementary information for  
**Stabilizing benzene-like planar N<sub>6</sub> rings to form a single atomic honeycomb BeN<sub>3</sub>  
sheet with high carrier mobility**

Xiaoyin Li,<sup>a,b</sup> Shunhong Zhang,<sup>c</sup> Cunzhi Zhang,<sup>b</sup> and Qian Wang<sup>\*a,b</sup>

<sup>a</sup>Center for Applied Physics and Technology, College of Engineering, Peking University; Key Laboratory of High Energy Density Physics Simulation, Ministry of Education, Beijing 100871, China

<sup>b</sup>Department of Materials Science and Engineering, College of Engineering, Peking University, Beijing 100871, China

<sup>c</sup>Institute for Advanced Study, Tsinghua University, Beijing 100084, China

**1. Other low-energy structures of BeN<sub>3</sub>**

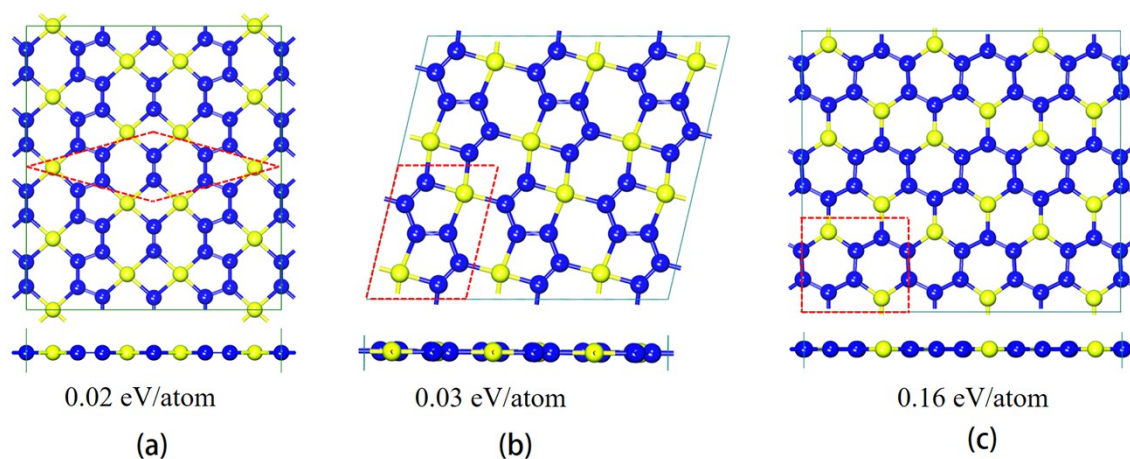

Fig. S1 Structures of other low-energy isomers of BeN<sub>3</sub> found by using the global structure search method and the comparison of their relative energies with respect to that of the lowest-energy structure *h*-BeN<sub>3</sub>. The red dashed lines denote unit cells.

## 2. IR and Raman spectra of $h\text{-BeN}_3$

With  $D_{6h}$  point symmetry, the optical modes of  $h\text{-BeN}_3$  at the  $\Gamma$  point can be represented as

(“I” and “R” represent the infrared and Raman activity respectively)

$$\Gamma_{\text{optical}}(h\text{-BeN}_3) = A_{1g}(\text{R}) \oplus A_{2g} \oplus 2A_{2u}(\text{I}) \oplus B_{1g} \oplus B_{1u} \oplus B_{2u} \oplus 2E_{1u}(\text{I}) \oplus E_{2u} \oplus E_{1g}(\text{R}) \oplus 3E_{2g}(\text{R}). \quad (1)$$

Those modes with  $A_{1g}$ ,  $E_{1g}$ , or  $E_{2g}$  symmetry have Raman activity, while those modes with  $A_{2u}$  or  $E_{1u}$  symmetry have IR activity.

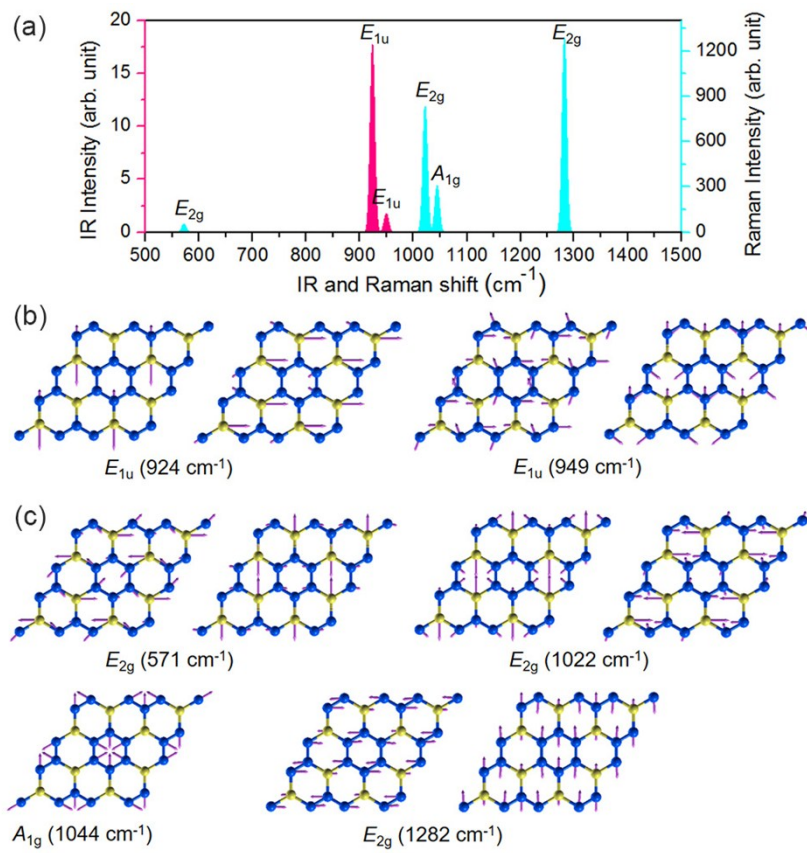

Fig. S2 (a) IR and Raman spectra of  $h\text{-BeN}_3$  (arb. unit represents arbitrary unit). (b) and (c) are the vibration modes corresponding to the peaks in IR and Raman spectra, respectively.

### 3. Thermal stability of $h$ -BeN<sub>3</sub>

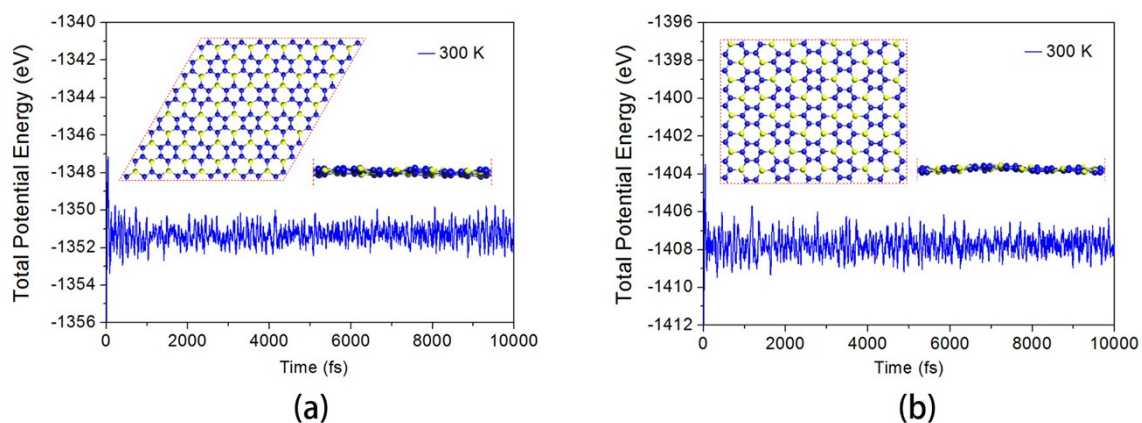

Fig. S3 Fluctuation of the total potential energy during AIMD simulations at temperature of 300 K with supercell of (a)  $5 \times 5$  and (b)  $3\sqrt{3} \times 4$  respectively. Insets are snapshots of the structures at the end of the simulations.

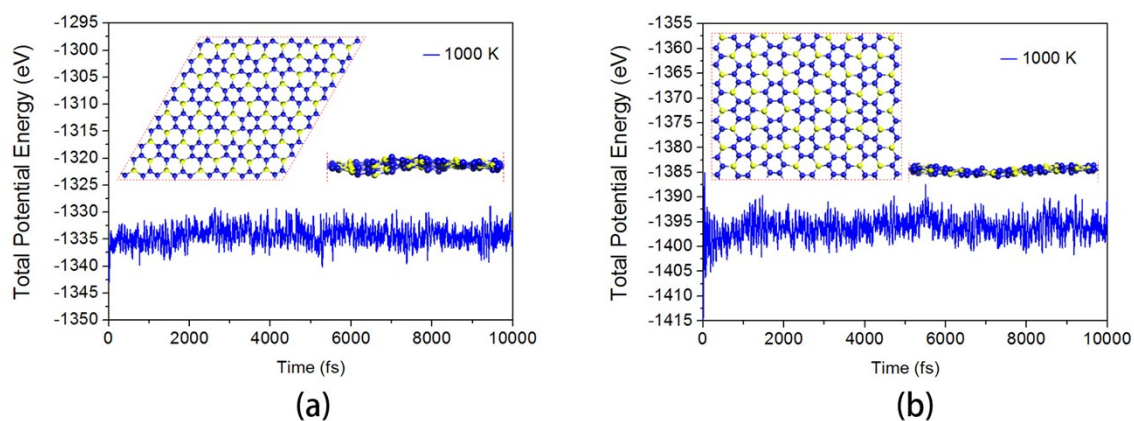

Fig. S4 Fluctuation of the total potential energy during AIMD simulation at temperature of 1000 K with supercell of (a)  $5 \times 5$  and (b)  $3\sqrt{3} \times 4$  respectively. Insets are snapshots of the structures at the end of the simulations.

#### 4. Tight-binding model of $h$ -BeN<sub>3</sub>

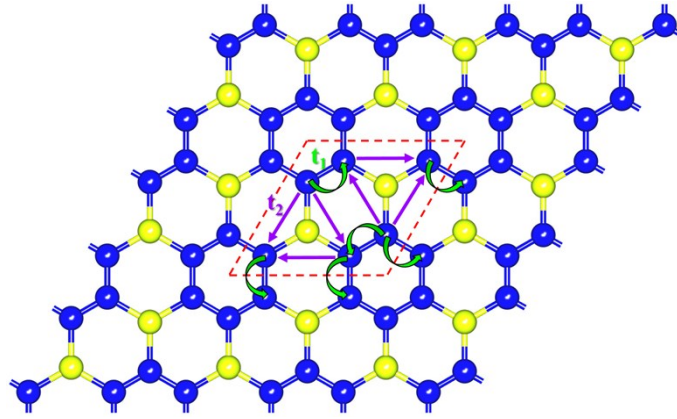

Fig. S5 Illustration of intra-ring hopping (green arrows,  $t_1$ ) and inter-ring hopping (purple arrows,  $t_2$ ) between N- $p_z$  orbitals. The red rhombus denotes the unit cell of  $h$ -BeN<sub>3</sub>.

#### 5. Carrier mobility of $h$ -BeN<sub>3</sub>

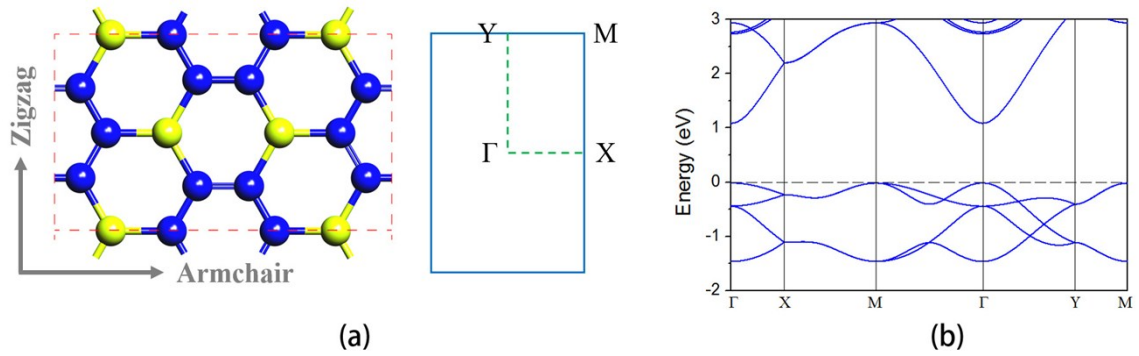

Fig. S6 (a) Atomic structure of  $h$ -BeN<sub>3</sub> in an orthogonal supercell and its corresponding Brillouin zone. (b) Electronic band structure of  $h$ -BeN<sub>3</sub> in the orthogonal lattice. Note that due to Brillouin zone folding, both  $\Gamma$  and M points become VBM, but we only consider the hole effective mass at  $\Gamma$ .

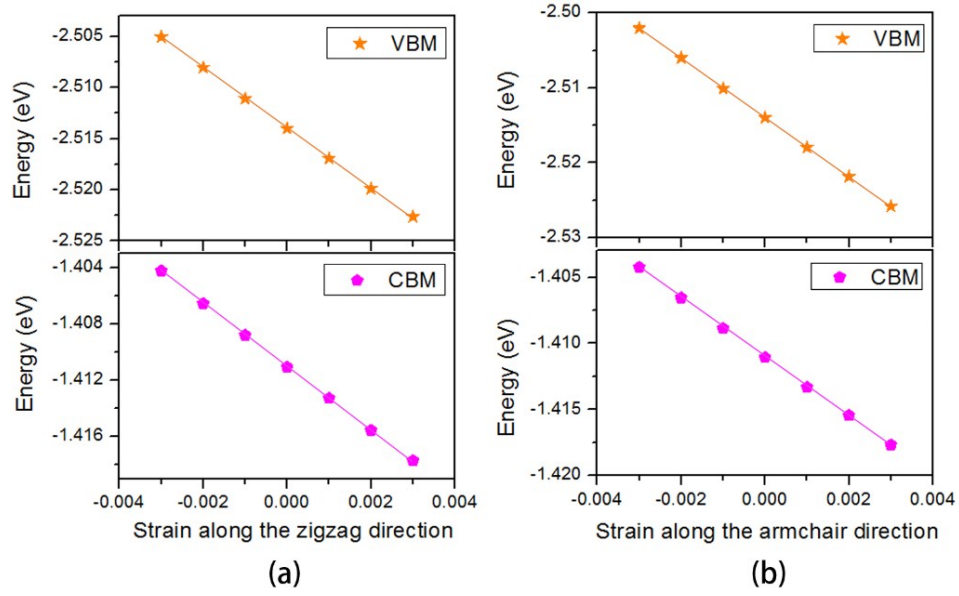

Fig. S7 Energy shift of the band edge (VBM and CBM) with respect to the lattice dilation and compression along the (a) zigzag and (b) armchair directions, respectively.
